# Supplementary material for: Changes in renal function after nephroureterectomy for upper urinary tract carcinoma: analysis of a large multicenter cohort (Radical Nephroureterectomy Outcomes (RaNeO) Research Consortium)
Source: Springer Nature journal article supplement (doi:10.1007/s00345-022-04156-3), 2022-10-06

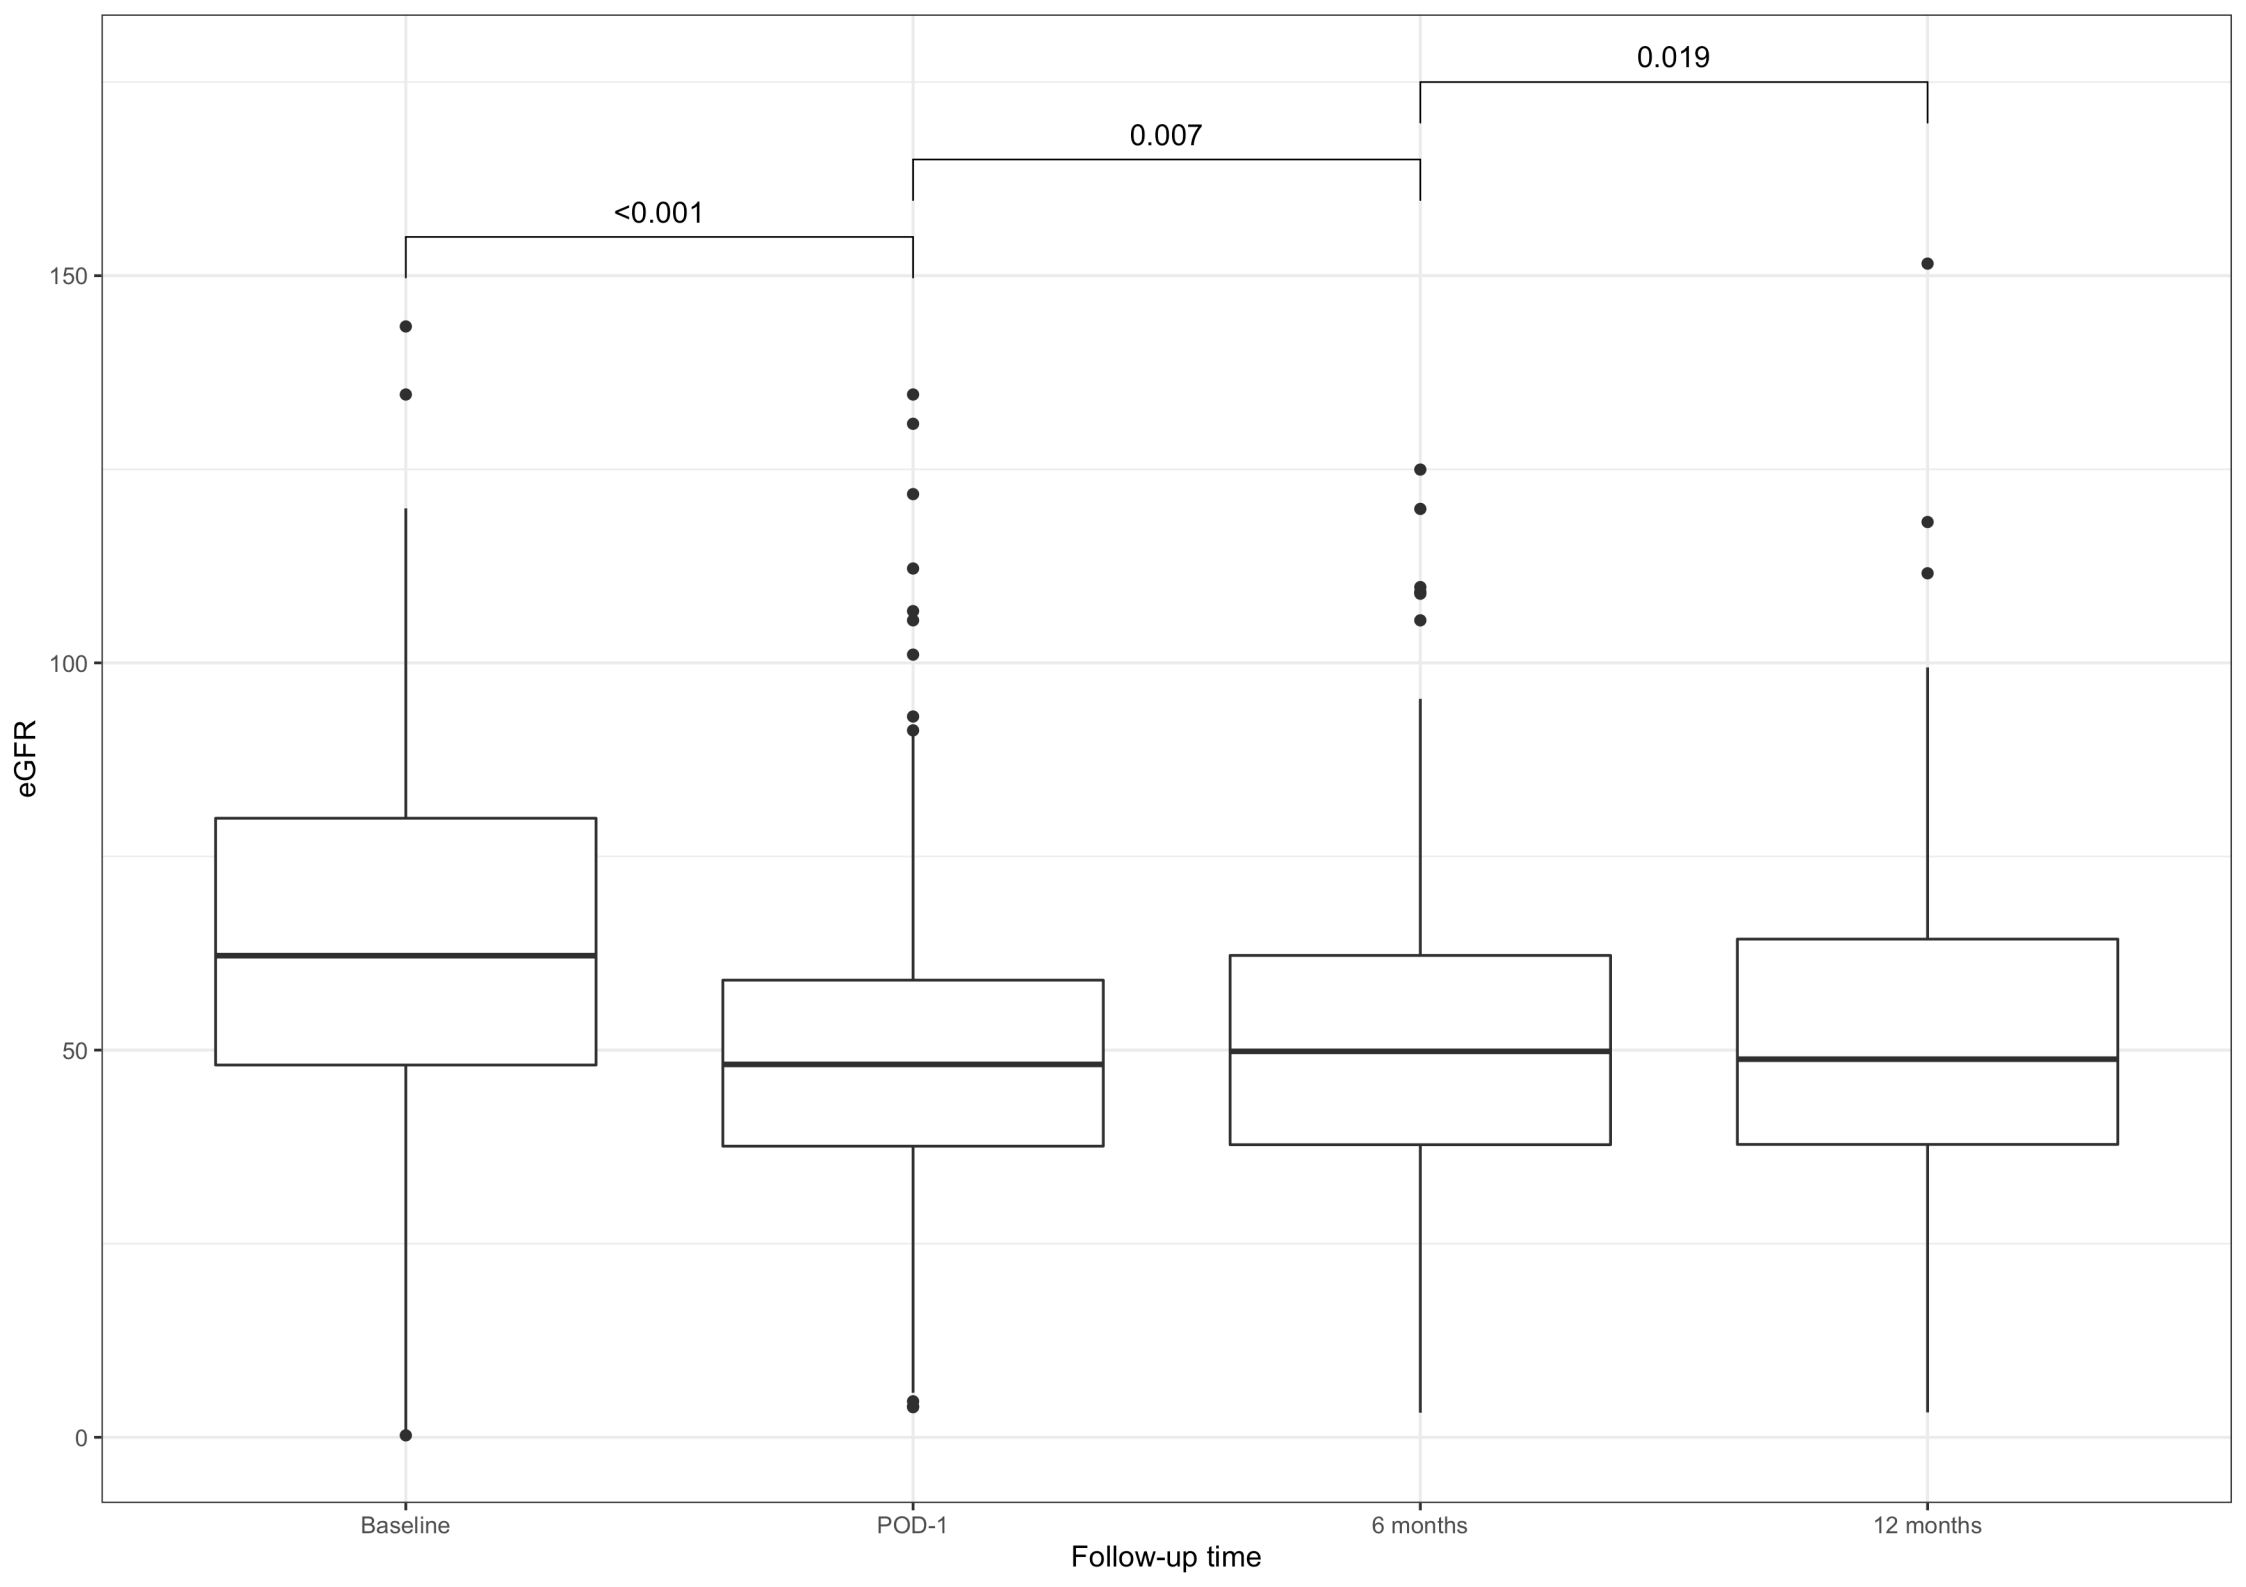

Supplement: MOESM1 [file 23577284]
